# Supplementary material
Source: PubMed Central journal article supplement (PMC3292301)
Supplement: cr2011165x4.pdf [file cr2011165x4.pdf]

# Fig.S3

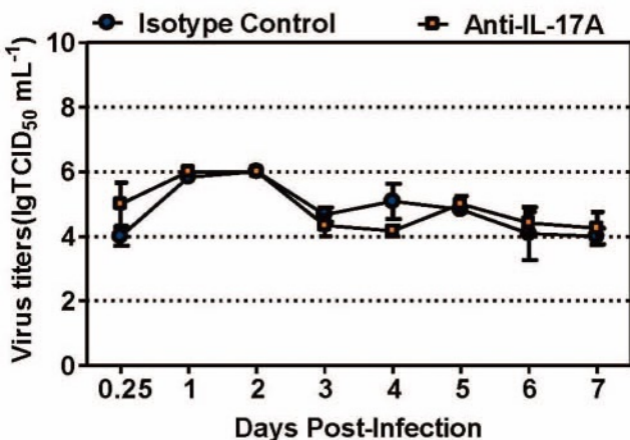

**Figure S3. Monoclonal antibodies against IL-17 do not alter the replication of S-OIV H1N1 in mice.** Four-week-old C57BL/6 mice treated intravenously with 50  $\mu\text{g}$  isotype control or anti-IL-17 antibody per mouse at 24 hours before inoculated and at 1 days and 3 days post inoculated with BJ501 H1N1 virus at  $10^{5.5}$  TCID<sub>50</sub> respectively. At the indicated times, mice lung tissue was collected and virus titers were determined by plaque assays in MDCK cells. The values are means $\pm$ SEM from three mice.
