# Supplementary material
Source: PubMed Central journal article supplement (PMC3292301)
Supplement: cr2011165x5.pdf [file cr2011165x5.pdf]

## **Supplementary information, Data S1 Materials and Methods**

**Reagents:** Isotype control antibody (Mouse IgG2b, purchased from Beijing Protein Innovation), Anti-TNF alpha Receptor II antibody (Entercept, purchased from Shanghai CP Guojian Pharmaceutical Co., Ltd).

**Mice:** Wild-type (WT) four-week-old C57BL/6 (B6) mice were purchased from Vital River, Beijing.

### **Anti-inflammatory sensitivity of viral infection in mice:**

Wild type (WT) four-week-old C57BL/6 (B6) mice were infected intranasally with  $10^{5.5}$  TCID<sub>50</sub> of BJ501 after being anesthetized with pentobarbital sodium. Subsequently, anti-TNF  $\alpha$  Receptor II antibodies or isotype control antibodies was administered (100  $\mu$ g per mouse every second day starting at one day before infection for four times): (1) Isotype control antibody; (2) anti-TNF-alpha Receptor II antibody. Survival rate, body weight change and acute pulmonary edema (Wet to dry ratio) measurements were performed as described in the Viral Pathogenesis in Mice section.
